# Supplementary material for: Coexistence of multiple coronaviruses in several bat colonies in an abandoned mineshaft
Source: Springer Nature journal article supplement (doi:10.1007/s12250-016-3713-9), 2016-02-01
Supplement: 12250_2016_3713_MOESM1_ESM.pdf [file 12250_2016_3713_MOESM1_ESM.pdf]

## Electronic Supplementary Material

# Coexistence of multiple coronaviruses in several bat colonies in an abandoned mineshaft

Xing-Yi Ge<sup>1#</sup>, Ning Wang<sup>1#</sup>, Wei Zhang<sup>1</sup>, Ben Hu<sup>1</sup>, Bei Li<sup>1</sup>, Yun-Zhi Zhang<sup>2,3</sup>, Ji-Hua Zhou<sup>2</sup>,  
Chu-Ming Luo<sup>1</sup>, Xing-Lou Yang<sup>1</sup>, Li-Jun Wu<sup>1</sup>, Bo Wang<sup>1</sup>, Yun Zhang<sup>4</sup>, Zong-Xiao Li<sup>4</sup>, Zheng-Li Shi<sup>1</sup>✉

1. Key Laboratory of Special Pathogens, Wuhan Institute of Virology, Chinese Academy of Sciences, Wuhan 430071, China
2. Yunnan Provincial Key Laboratory for Zoonosis Control and Prevention, Yunnan Institute of Endemic Diseases Control and Prevention, Dali 671000, China
3. School of Public Health, Dali University, Dali 671000, China
4. Mojiang Center for Diseases Control and Prevention, Mojiang 654800, China

Supporting information to DOI: 10.1007/s12250-016-3713-9

Table S1. Comparison of 8 S genes obtained here with 4 reference sequences of BtCoV 1.

| Virus strains     | Length (bp) | Pairwise identities of nucleotides and amino acids % (nt/aa) |                |                    |                    |                  |                  |                |                  |               |               |               |
|-------------------|-------------|--------------------------------------------------------------|----------------|--------------------|--------------------|------------------|------------------|----------------|------------------|---------------|---------------|---------------|
|                   |             | Mful BtCoV/ 3709                                             | RsBt CoV/ 3716 | Mful BtCoV/ 3736-1 | Mful BtCoV/ 3759-1 | MsBt CoV/ 4001-1 | MsBt CoV/ 4068-1 | MsBt CoV/ 3710 | MsBt CoV/ 4056-1 | BtCo V-1A     | BtCo V-1B     | BtCoV -KY27   |
| MfulBtCoV/ 3709   | 4,137       |                                                              |                |                    |                    |                  |                  |                |                  |               |               |               |
| RsBtCoV/ 3716     | 4,134       | 90.3/<br>86.1                                                |                |                    |                    |                  |                  |                |                  |               |               |               |
| MfulBtCoV/ 3736-1 | 4,125       | 93.1/<br>92.8                                                | 90.7/<br>86.8  |                    |                    |                  |                  |                |                  |               |               |               |
| MfulBtCoV/ 3759-1 | 4,128       | 93.1/<br>91.7                                                | 91.2/<br>87.4  | 96.3/<br>96.2      |                    |                  |                  |                |                  |               |               |               |
| MsBtCoV/ 4001-1   | 4,128       | 93.1/<br>91.6                                                | 90.4/<br>86.1  | 94.0/<br>92.9      | 94.2/<br>93.7      |                  |                  |                |                  |               |               |               |
| MsBtCoV/ 4068-1   | 4,128       | 93.1/<br>91.6                                                | 91.2/<br>87.3  | 96.3/<br>96.1      | 99.9/<br>99.9      | 94.2/<br>93.6    |                  |                |                  |               |               |               |
| MsBtCoV/ 3710     | 4,134       | 86.3/<br>83.8                                                | 87.8/<br>86.7  | 86.3/<br>84.6      | 86.7/<br>85.0      | 86.3/<br>84.5    | 86.6/<br>85.0    |                |                  |               |               |               |
| MsBtCoV/ 4056-1   | 4,128       | 87.5/<br>86.9                                                | 86.3/<br>84.3  | 87.3/<br>86.9      | 87.3/<br>87.4      | 87.9/<br>88.9    | 87.3/<br>87.3    | 93.9/<br>93.6  |                  |               |               |               |
| BtCoV-1A          | 4,128       | 87.6/<br>86.1                                                | 86.4/<br>83.1  | 87.8/<br>87.0      | 87.9/<br>87.0      | 88.6/<br>88.0    | 87.9/<br>86.9    | 89.6/<br>88.7  | 91.5/<br>93.0    |               |               |               |
| BtCoV-1B          | 4,158       | 92.9/<br>89.9                                                | 90.5/<br>84.8  | 93.5/<br>91.8      | 94.0/<br>92.2      | 96.2/<br>95.9    | 94.0/<br>92.1    | 86.5/<br>84.1  | 88.2/<br>88.0    | 88.6/<br>87.1 |               |               |
| BtCoV -KY27       | 4,128       | 83.3/<br>84.2                                                | 83.3/<br>82.3  | 84.2/<br>85.9      | 84.6/<br>86.1      | 83.9/<br>84      | 84.6/<br>86.0    | 83.2/<br>84.4  | 83.7/<br>85.9    | 83.7/<br>85.1 | 83.7/<br>83.3 |               |
| BtCoV-Anhui911    | 4,134       | 87.9/<br>86.1                                                | 86.2/<br>82.5  | 88.1/<br>87.3      | 88.6/<br>87.7      | 88.0/<br>86.7    | 88.6/<br>87.6    | 89.3/<br>88.3  | 90.6/<br>90.9    | 94.6/<br>93.4 | 88.1/<br>86.7 | 84.1/<br>85.9 |
